# Supplementary material for: Allele-specific CRISPR-Cas9 editing inactivates a single nucleotide variant associated with collagen VI muscular dystrophy
Source: PubMed Central journal article supplement — Mol Ther Nucleic Acids. 2024 Jul 16;35(3):102269. doi: 10.1016/j.omtn.2024.102269 (PMC11338111; doi:10.1016/j.omtn.2024.102269), 2024-07-16
Supplement: mmc1.pdf [file mmc1.pdf]

OMTN, Volume 35

## **Supplemental information**

**Allele-specific CRISPR-Cas9 editing inactivates  
a single nucleotide variant associated  
with collagen VI muscular dystrophy**

**Véronique Bolduc, Katherine Sizov, Astrid Brull, Eric Esposito, Grace S. Chen, Prech Uapinyoying, Apurva Sarathy, Kory R. Johnson, and Carsten G. Bönnemann**

**A**

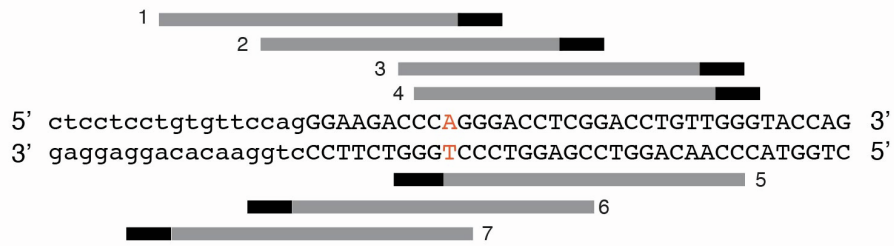

**B**

| ID  | Target / PAM               | Strand | Broad efficacy score | combined rank | MIT specificity score (0-100) | Number Off-targets (0-1-2 mismatches) | Location of variant vs PAM |
|-----|----------------------------|--------|----------------------|---------------|-------------------------------|---------------------------------------|----------------------------|
| 5*  | CCAACAGGTCCGAGGTCCCT/ GGG  | (-)    | -0.03                | 3             | 63                            | 0-1-0                                 | proximal                   |
| 4   | CCAGGGACCTCGGACCTGTT/ GGG  | (+)    | -0.26                | 7             | 47                            | 0-1-0                                 | distal                     |
| 3   | CCCAGGGACCTCGGACCTGT/ TGG  | (+)    | -0.21                | 4             | 44                            | 0-1-1                                 | distal                     |
| 1** | tgtgttccagGGAAGACCCA/ GGG  | (+)    | 0.86                 | 1             | 43                            | 0-2-6                                 | proximal                   |
| 6   | CGAGGTCCC TGGGTCTTCCc/ tgg | (-)    | -0.03                | 5             | 39                            | 0-2-0                                 | distal                     |
| 7   | CTGGGTCTTCCctggaacac/ agg  | (-)    | 0.11                 | 6             | 35                            | 0-1-10                                | distal                     |
| 2   | cagGGAAGACCCAGGGACCT/ CGG  | (+)    | 0.13                 | 2             | 32                            | 0-2-6                                 | proximal                   |

\*gRNA-B    \*\*gRNA-A

**C**

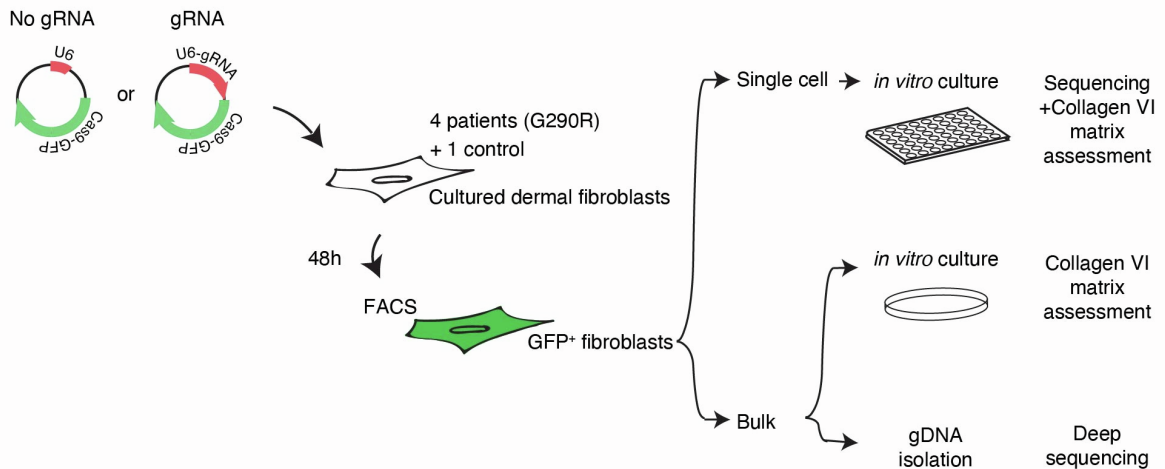

**Figure S1. Strategy for allele-specific gene editing of the *COL6A1* c.868G>A (G290R) variant.**

(A) The localization of potential allele-specific gRNAs for the c.868G>A variant is illustrated along the *COL6A1* genomic sequence. gRNAs hybridizing to the negative (-) strand are shown below, while gRNAs hybridizing to the positive (+) strand are shown above the sequence. (B) The sequences of all potential gRNAs are listed, together with the sequences of the adjacent PAM sites.

The presence of the mutation within a 10-nt distance of the PAM site was considered proximal. ID 1 was chosen as gRNA-A and ID 5 was chosen as gRNA-B. (C) Schematics of the experimental procedures followed in the study. Note that all experiments were conducted on GFP<sup>+</sup>-sorted cells (enriching for cells transfected with the gene editing constructs).

**A**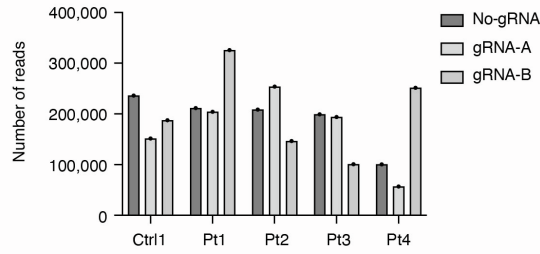**B**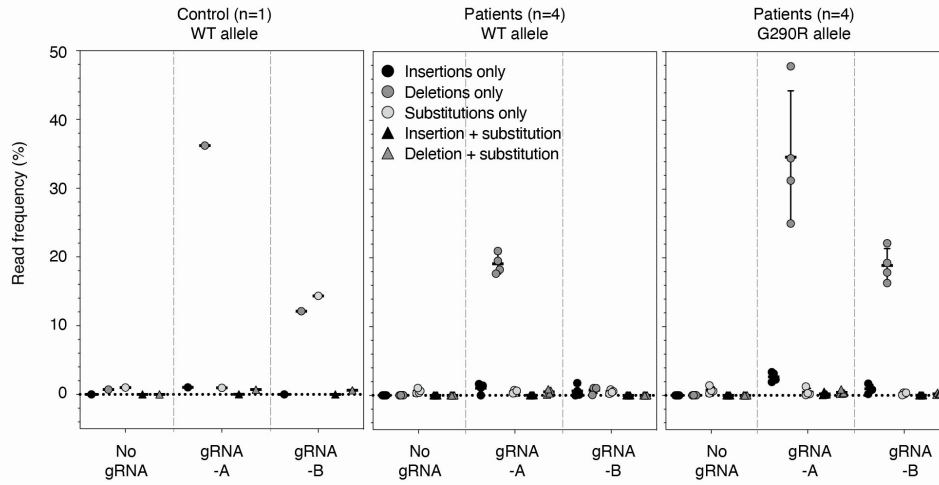**C**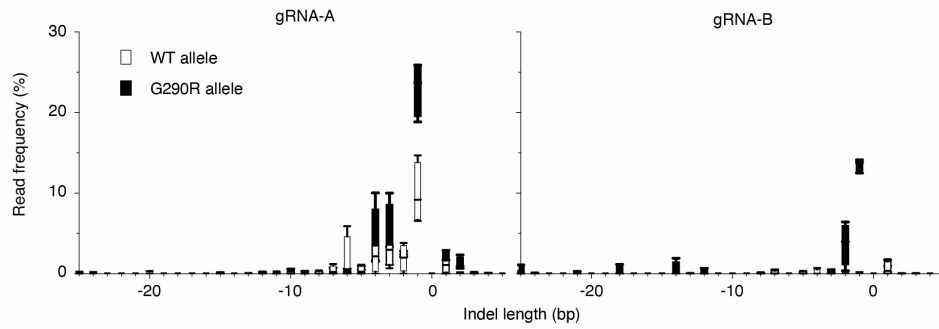**D**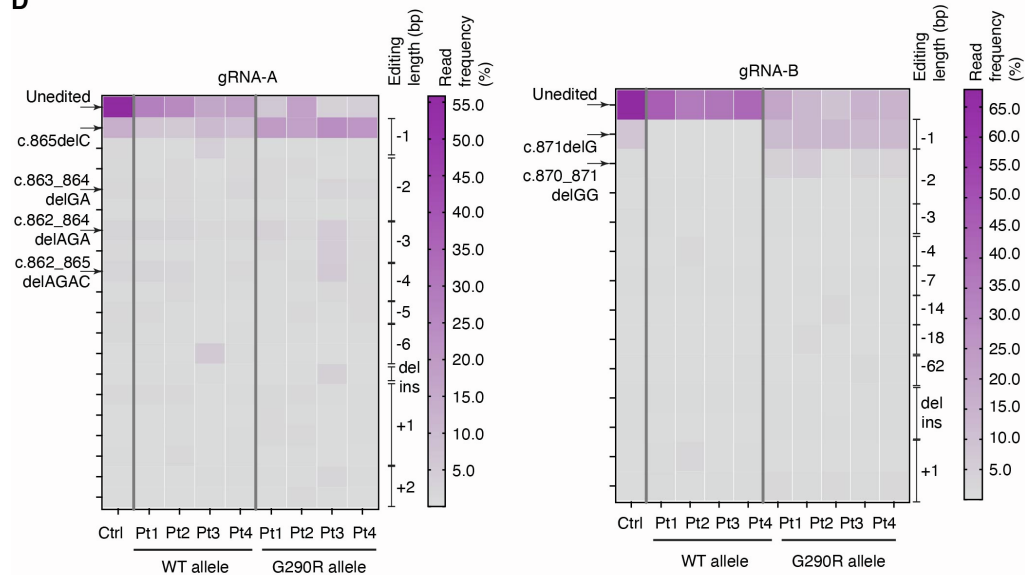

**Figure S2. Targeted re-sequencing analysis of the repair outcomes after gene editing with gRNA-A or gRNA-B.**

Analysis of Illumina Mi-Seq sequencing reads for four patient and one control primary cells co-transfected with Cas9-GFP and with either gRNA-A, gRNA-B, or without gRNA (No gRNA). **(A)** Total number of sequencing reads, per sample. The total number of reads was subsequently used as the denominator to calculate the read frequency in each sample. **(B)** Total read frequencies per indel/edit type (deletions, insertions, substitutions, or combination thereof) and per allele type (WT or G290R). Bars represent average  $\pm$  standard deviation. **(C)** Total read frequencies per indel length, and per allele type, reported as box and whisker plots, for gRNA-A (left) and gRNA-B (right). On the x axes, the negative scale represents length of deletions, while the positive site represents length of insertions. **(D)** Heatmaps of the top 20 motifs for their total read frequencies, identified at the G290R allele in patient samples, and displayed by individual.

**A**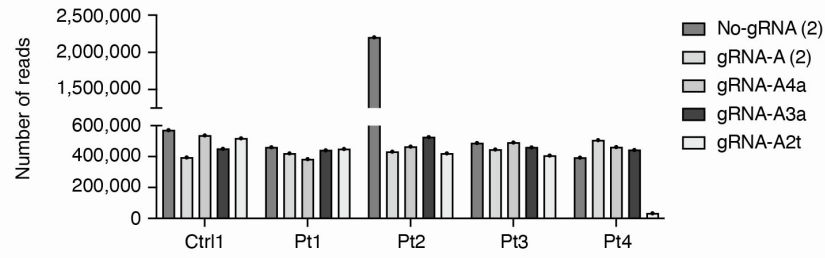**B**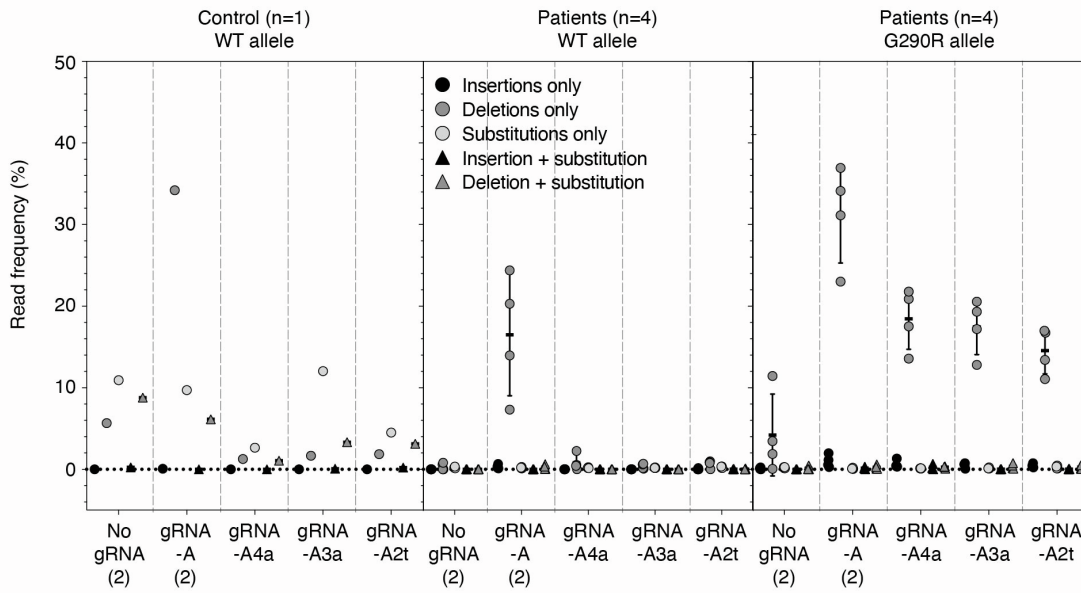**C**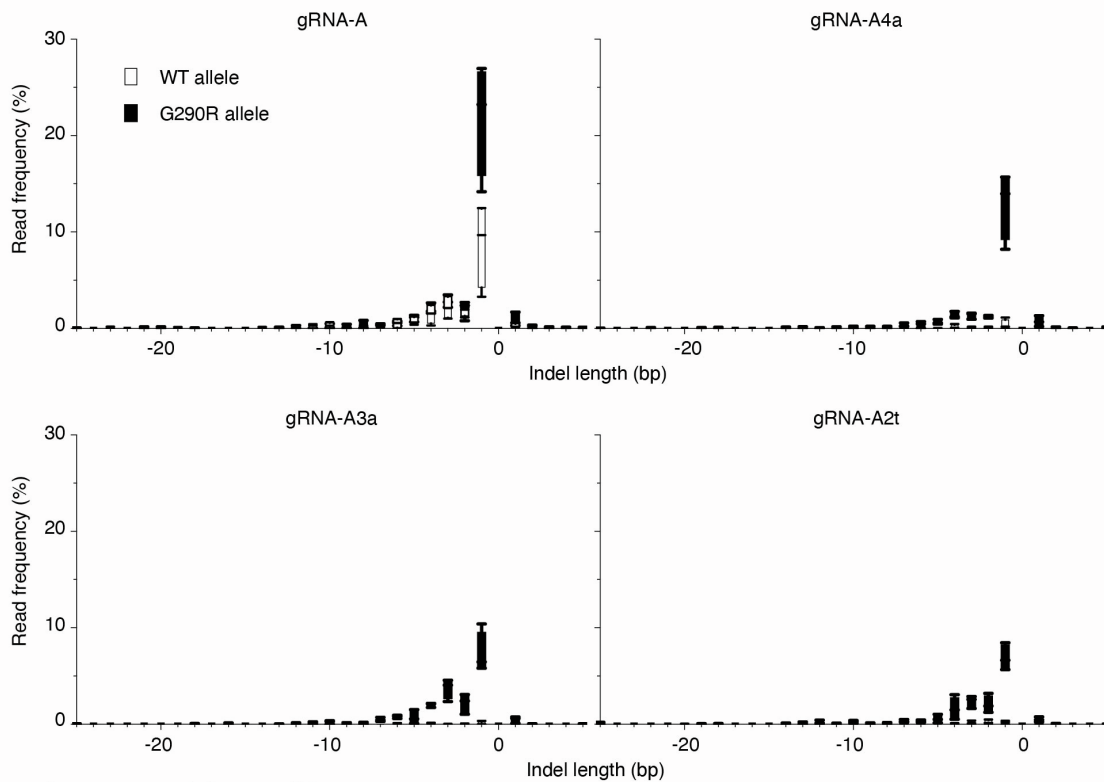

**Figure S3. Targeted re-sequencing analysis of the repair outcomes after gene editing with gRNA-A4A, gRNA-A3A or gRNA-A2T.**

Analysis of Illumina Mi-Seq sequencing reads for four patient and one control primary cells co-transfected with Cas9-GFP and with either gRNA-A, gRNA-A4a, gRNA-A3a, gRNA-A2t, or without gRNA (No gRNA). Note that gRNA-A and No gRNA in this experiment are replicates from the previous experiment. **(A)** Total number of sequencing reads, per sample. The total number of reads was subsequently used as the denominator to calculate the read frequency in each sample. **(B)** Total read frequencies per indel/edit type (deletions, insertions, substitutions, or combination thereof) and per allele type (WT or G290R). Bars represent average  $\pm$  standard deviation. **(C)** Total read frequencies per indel length, and per allele type, reported as box and whisker plots, for each of the gRNA. On the x axes, the negative scale represents length of deletions, while the positive site represents length of insertions. **(D)** Heatmaps of the top 20 motifs for their total read frequencies, identified at the G290R allele in patient samples, and displayed by individual.

**A**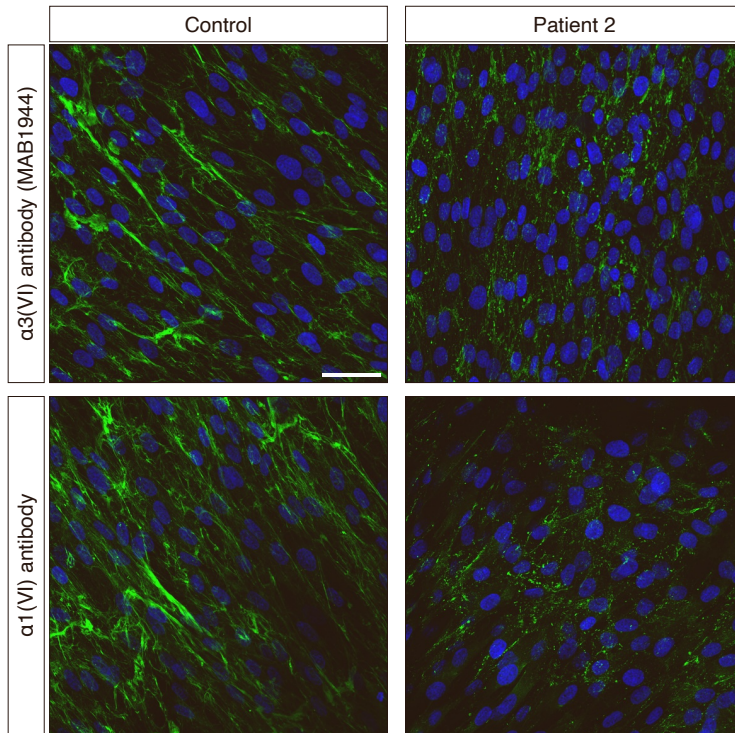**B**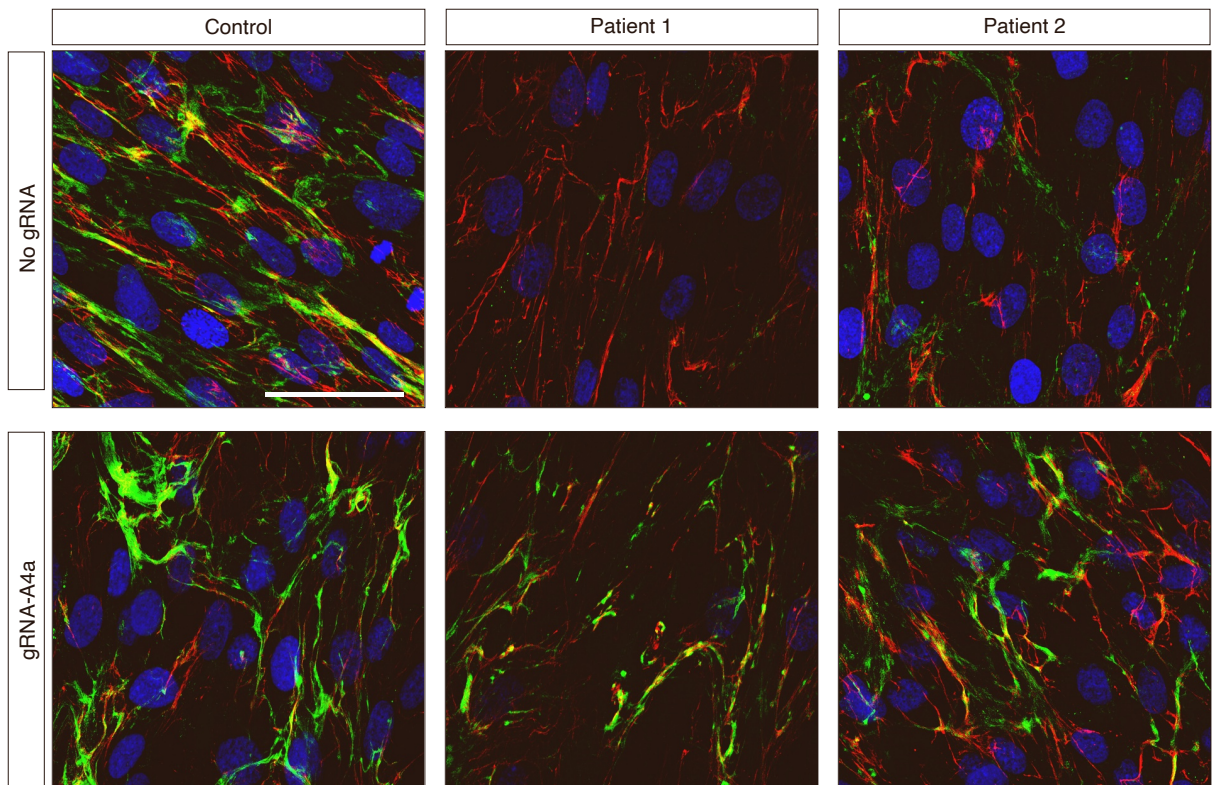



**Figure S4. Assessment of the collagen VI matrix in the extracellular space.**

Immunostaining of the collagen VI matrix secreted by patient-derived cultured fibroblasts. **(A)** Comparison of a Collagen  $\alpha 1$ (VI) antibody (gift of M.L. Chu) and a Collagen  $\alpha 3$ (VI) antibody (MAB1944) to detect the collagen VI matrix. Green signal is collagen VI, blue signal represents the nuclei. Bar = 50  $\mu$ m. **(B)** High-resolution confocal microscopy of the collagen VI matrix (green) interaction with fibronectin (red). Nuclei are labeled in blue. Bar = 50  $\mu$ m.
